# Supplementary material
Source: Springer Nature journal article supplement (https://www.springermedizin.de/resource/supplementary/13690_2011_17_MOESM1_ESM.pdf/9422458)

(a) Model with age on January, 1st

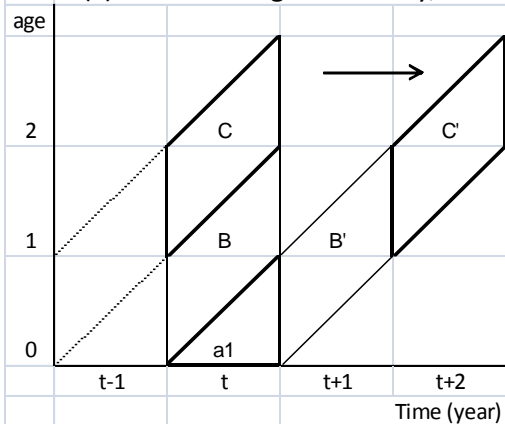

(b) Model with age at last birthday

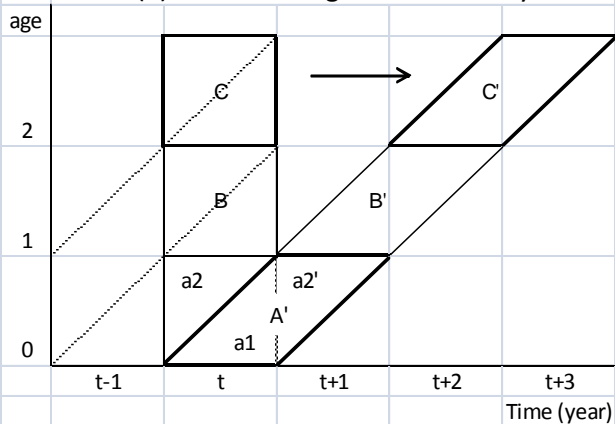

Supplement: MOESM1 [file 9422458]
